# Supplementary material for: LncRNA FAM181A-AS1 promotes gliomagenesis by sponging miR-129-5p and upregulating ZRANB2
Source: publisher site journal article supplement (doi:10.18632/aging.103391), 2020-10-20
Supplement: Supplementary file [file aging-v12i20-103391-supplementary-material-SD1.pdf]

SUPPLEMENTARY FIGURES

Supplementary Figures

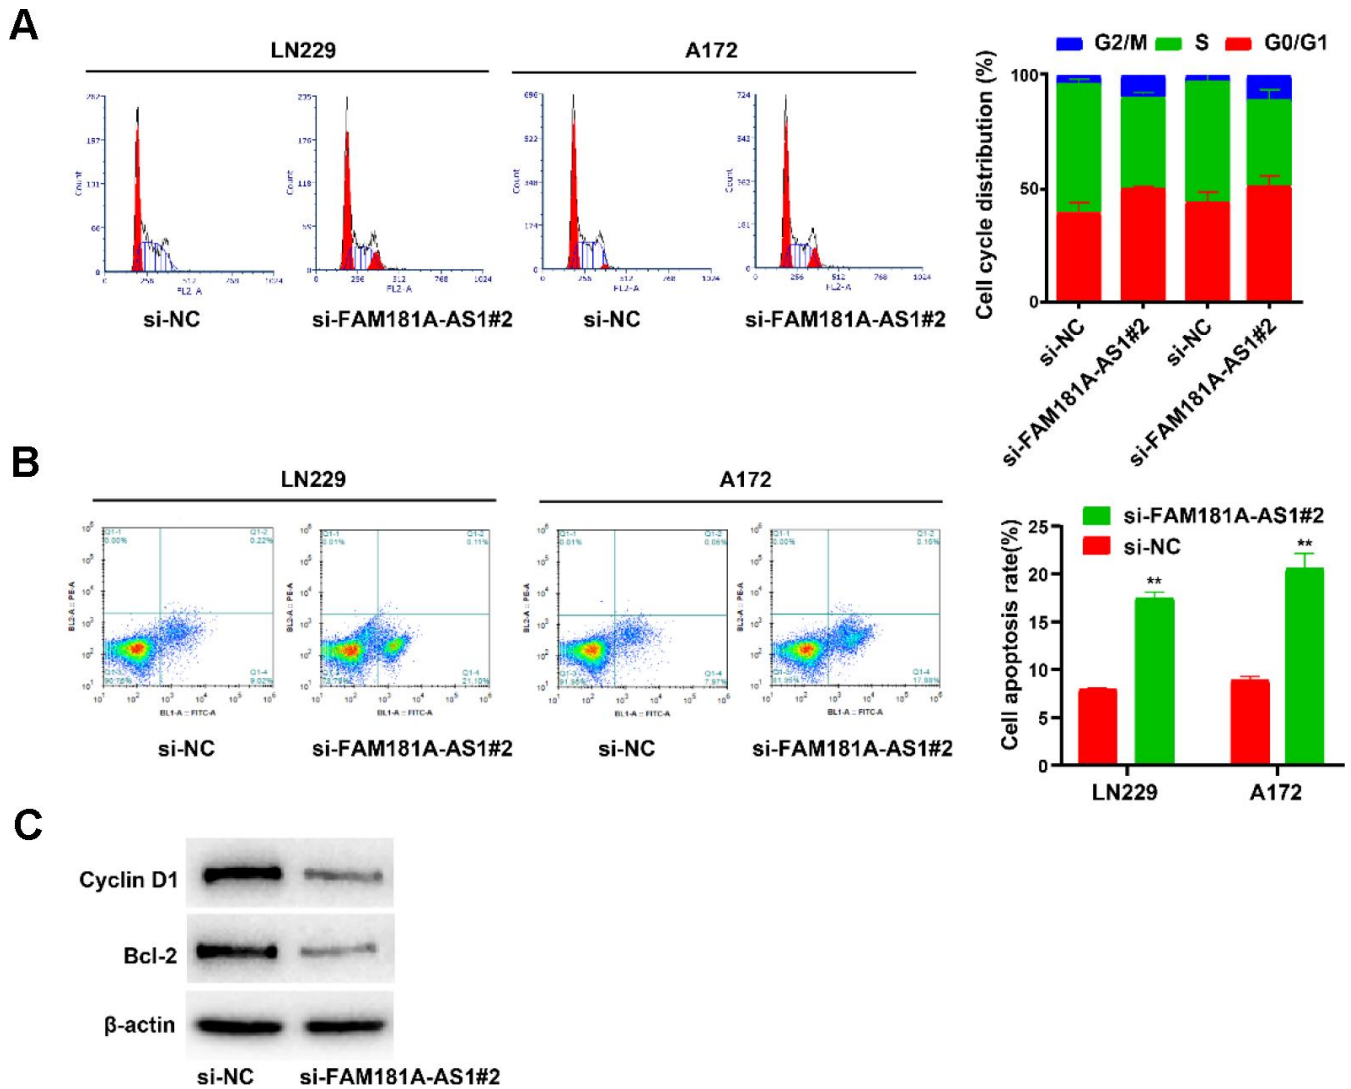

**Supplementary Figure 1. *FAM181A-AS1* downregulation inhibits cell cycle and promotes cell apoptosis.** (A) Cell cycle was detected. Cytometry showed the cells were arrested in G0/G1 phase after treated with *FAM181A-AS1* siRNA in LN229 and A172 cells. (B) Cell apoptosis was detected. Cytometry showed the downregulation of *FAM181A-AS1* promoted the apoptosis of LN229 and A172 cells. (C) Western blot showing that knockdown of *FAM181A-AS1* downregulated the expression of Cyclin D1 and Bcl-2. \*\* $P < 0.01$ , data represent the mean  $\pm$  SD.

A

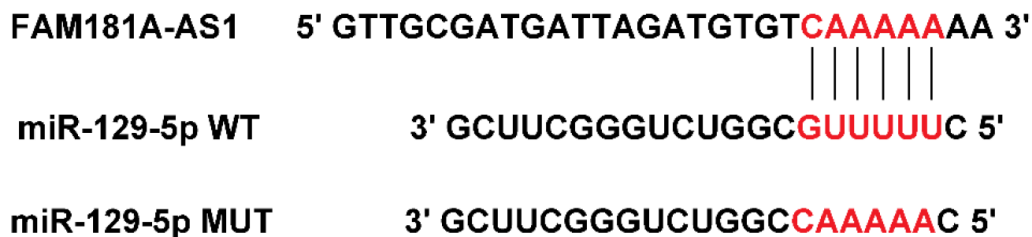

B

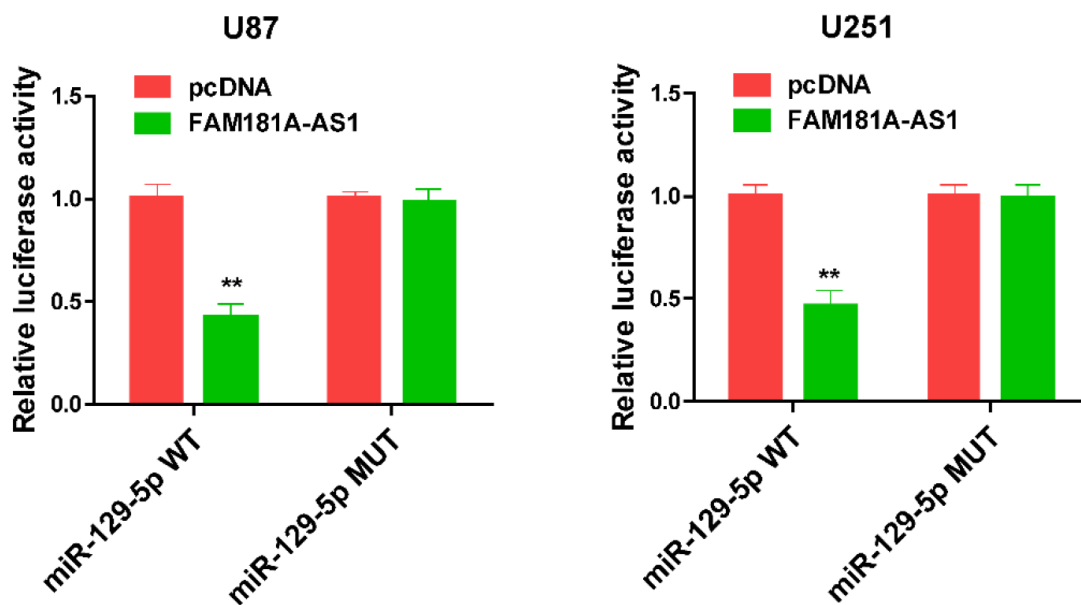

**Supplementary Figure 2.** The effect of *FAM181A-AS1* overexpression on the luciferase activity of miR-129-5p WT or MUT. (A) Images of the linking sites between *FAM181A-AS1* and miR-129-5p WT/MUT. (B) Assessment of the luciferase activity of miR-129-5p WT/MUT subsequent to transfection of U87 and U251 cell lines with *FAM181A-AS1* overexpression plasmid. \*\* $P < 0.01$ , data represent the mean  $\pm$  SD.
